# Supplementary material for: The role of cardiopulmonary exercise testing in predicting mortality and morbidity in people with congenital heart disease: a systematic review and meta-analysis
Source: Oxford University Press journal article supplement (doi:10.1093/eurjpc/zwab125), 2021-07-19
Supplement: zwab125_supplementary_data.docx [file zwab125_supplementary_data.docx]

Contents

[Prisma S 2021 Checklist 2](#_Toc70087202)

[Reason for full text exclusion 4](#_Toc70087203)

[Studies included and exercise modality 15](#_Toc70087204)

[Risk of Bias 19](#_Toc70087205)

[Stata code 45](#_Toc70087206)

[SWiM table 1. 46](#_Toc70087207)

[Funnel plot from primary analysis 51](#_Toc70087208)

[Data excluded from primary analysis 52](#_Toc70087209)

[Dichotomous data excluded from secondary analysis 53](#_Toc70087210)

[All analyses for individual CPET parameters 55](#_Toc70087211)

[Peak VO2 55](#_Toc70087212)

[VE/VCO2 slope 58](#_Toc70087213)

[Heart rate reserve 61](#_Toc70087214)

[Gas exchange threshold 64](#_Toc70087215)

[Peak heart rate 64](#_Toc70087216)

[Peak systolic blood pressure 68](#_Toc70087217)

[Peak watts 68](#_Toc70087218)

[Peak oxygen saturations 68](#_Toc70087219)

[Peak oxygen pulse 69](#_Toc70087220)

| Prisma S 2021 Checklist **This 2021 PRISMA checklist was created post publication of our protocol.** | | | | |
| --- | --- | --- | --- | --- |
| **SECTION/TOPIC** | **ITEM #** | **CHECKLIST ITEM** | **PAGE NO.** | **Comment** |
| **INFORMATION SOURCES AND METHODS** | | |  |  |
| Database name | 1 | Name each individual database searched, stating the platform for each. | 6 | See document "The following electronic databases were searched: Allied and Complementary Medicine Database (EBSCO), CINAHL® Complete (EBSCO), SPORTDiscus (EBSCO), Medline (Ovid), Embase (Ovid), Web of Science (Thomson Reuters), and Cochrane Central Register of Controlled Trials. " |
| Multi-database searching | 2 | If databases were searched simultaneously on a single platform, state the name of the platform, listing all of the databases searched. | 6 | See document |
| Study registries | 3 | List any study registries searched. | N/A | Ongoing trials were not sought due to the nature of this review. Moreover, this was not included within the peer-reviewed published protocol so it was not conducted. |
| Online resources and browsing | 4 | Describe any online or print source purposefully searched or browsed (e.g., tables of contents, print conference proceedings, web sites), and how this was done. | N/A | Not included within the published protocol. Therefore, this was not conducted. |
| Citation searching | 5 | Indicate whether cited references or citing references were examined, and describe any methods used for locating cited/citing references (e.g., browsing reference lists, using a citation index, setting up email alerts for references citing included studies). | 6 | See document "Forward and backward citation chasing was also performed. " |
| Contacts | 6 | Indicate whether additional studies or data were sought by contacting authors, experts, manufacturers, or others. | N/A | Not included within the peer reviewed published protocol. Therefore, this was not conducted. |
| Other methods | 7 | Describe any additional information sources or search methods used. | N/A | Electronic searches and forwards and backwards citation chasing was deemed satisfactory. No further methods were undertaken. |
| **SEARCH STRATEGIES** | | |  |  |
| Full search strategies | 8 | Include the search strategies for each database and information source, copied and pasted exactly as run. | See protocol paper | Medline search strategy was appended to the protocol publication, this was adapted to each search engine. |
| Limits and restrictions | 9 | Specify that no limits were used, or describe any limits or restrictions applied to a search (e.g., date or time period, language, study design) and provide justification for their use. | P5 to P6 | See document: "All study designs that addressed the research question were considered for inclusion. Only peer reviewed full-text papers written in English were included. Previous reviews or case reports were excluded."... "Searches were performed on the 30th of April 2020 with no lower limit on publication date." |
| Search filters | 10 | Indicate whether published search filters were used (as originally designed or modified), and if so, cite the filter(s) used. | N/A | No filters were used to increase the yield of searches. |
| Prior work | 11 | Indicate when search strategies from other literature reviews were adapted or reused for a substantive part or all of the search, citing the previous review(s). | N/A | New search. |
| Updates | 12 | Report the methods used to update the search(es) (e.g., rerunning searches, email alerts). | N/A | Searches have not been updated, as it was a new search conducted <1year ago. |
| Dates of searches | 13 | For each search strategy, provide the date when the last search occurred. | 6 | 30th of April 2020 |
| **PEER REVIEW** | | |  |  |
| Peer review | 14 | Describe any search peer review process. | 6 | Information Specialist Simon Briscoe from the University of Exeter helped design the search strategy (acknowledged in the protocol). And the protocol was peer reviewed by experts in the Journal of Congenital Cardiology. |
| **MANAGING RECORDS** | | |  |  |
| Total records | 15 | Document the total number of records identified from each database and other information sources. | 9 | See document (Figure 1 and in text). Yield from each database was not recorded. |
| Deduplication | 16 | Describe the processes and any software used to deduplicate records from multiple database searches and other information sources. | 6 | Covidence® (Veritas Health Innovation Ltd., Melbourne, Australia). |

# Reason for full text exclusion

| Study | Notes |
| --- | --- |
| Abassi 2019 | Exclusion reason: Wrong outcomes |
| Agarwal 2018 | Exclusion reason: Wrong outcomes; |
| Ait-Ali 2014 | Exclusion reason: Wrong research question |
| Akam-Venkata 2019 | Exclusion reason: Wrong outcomes; |
| Alborino 2002 | Exclusion reason: Wrong patient population; |
| Alexander 2006 | Exclusion reason: Wrong exercise protocol; |
| Alsaied 2018 | Exclusion reason: Wrong outcomes; -5- |
| Amato 1998 | Exclusion reason: Wrong patient population; |
| Amato 2001 | Exclusion reason: Wrong patient population; |
| Amorim 2005 | Exclusion reason: Authors contacted no full text available |
| Anand 2006 | Exclusion reason: Wrong outcomes; |
| Anderson 2008 | Exclusion reason: Wrong research question |
| Andrade 2019 | Exclusion reason: Wrong outcomes; |
| Arena 2011 | Exclusion reason: Review ; |
| Armstrong 2019 | Exclusion reason: Wrong research question |
| Baldi 2019 | Exclusion reason: Wrong patient population; |
| BambulHeck 2017 | Exclusion reason: Wrong exercise protocol; |
| Becker-Grunig 2013 | Exclusion reason: Wrong study design; |
| Bertrand 2015 | Exclusion reason: Wrong patient population; |
| Bissessor 2009 | Exclusion reason: Wrong patient population; |
| Bolz 2005 | Exclusion reason: Wrong research question |
| Bonow 1980 | Exclusion reason: Wrong patient population; |
| Bonow 1984 | Exclusion reason: Wrong patient population; |
| Borer 1998 | Exclusion reason: Wrong patient population; |
| Borik 2015 | Exclusion reason: Wrong research question |
| Bouchart 2000 | Exclusion reason: Wrong exercise protocol; |
| Bourque 2009 | Exclusion reason: Wrong patient population; |
| Broberg 2014 | Exclusion reason: Wrong research question |
| Buber 2019 | Exclusion reason: Wrong research question |
| Buelow 2015 | Exclusion reason: Authors contacted no full text available |
| Buelow 2015 | Exclusion reason: No published full text available; |
| Buheitel 1999 | Exclusion reason: Wrong language; |
| Buys 2013 | Exclusion reason: Wrong outcomes; -7-7 |
| Buys 2013 | Exclusion reason: Wrong outcomes; -5- |
| Capoulade 2014 | Exclusion reason: Wrong patient population; |
| Chaix 2017 | Exclusion reason: Wrong research question |
| Chiu 2012 | Exclusion reason: Wrong outcomes; -5- |
| Christensen 2016 | Exclusion reason: Wrong patient population; |
| Christensen 2017 | Exclusion reason: Wrong patient population; |
| Cieplucha 2013 | Exclusion reason: Wrong outcomes; -5- |
| Cortez 2017 | Exclusion reason: Wrong research question |
| Crumb 2011 | Exclusion reason: Wrong research question |
| Cuypers 2013 | Exclusion reason: Wrong research question |
| Cuypers 2014 | Exclusion reason: CPET data not reported; |
| Cuypers 2014 | Exclusion reason: CPET data not reported; |
| Cuypers 2017 | Exclusion reason: Wrong research question |
| DÅ‚uÅ¼niewska 2018 | Exclusion reason: Wrong outcomes; |
| Das 2005 | Exclusion reason: Wrong patient population; |
| Davos 2009 | Exclusion reason: Wrong outcomes; |
| DeKoning 2008 | Exclusion reason: Wrong research question |
| deKoning 2013 | Exclusion reason: Wrong outcomes; -6-5 |
| Dhoble 2014 | Exclusion reason: Wrong patient population; |
| Dijkema 2019 | Exclusion reason: Wrong outcomes; |
| Discigil 2001 | Exclusion reason: Wrong exercise protocol; |
| Domanski 2017 | Exclusion reason: Wrong patient population; |
| Dominguez-Rodriguez 2014 | Exclusion reason: Wrong patient population; |
| Driscoll 2009 | Exclusion reason: Editorial; |
| d'Udekem 2009 | Exclusion reason: Wrong research question |
| Ebenroth 2007 | Exclusion reason: Wrong outcomes; -5- |
| Eckerstrom 2020 | Exclusion reason: Wrong outcomes; |
| Egbe 2019 | Exclusion reason: Wrong research question |
| Fernandes 2010 | Exclusion reason: Wrong outcomes; |
| Fraser 2009 | Exclusion reason: Wrong research question |
| Gabriel 2002 | Exclusion reason: Wrong exercise protocol; |
| Gavotto 2019 | Exclusion reason: Wrong outcomes; |
| Goublaire 2018 | Exclusion reason: Wrong patient population; |
| Grigioni 2006 | Exclusion reason: Wrong patient population; |
| Heiberg 2015 | Exclusion reason: Wrong outcomes; |
| Hetzer 2015 | Exclusion reason: Wrong research question |
| Hochreiter 1986 | Exclusion reason: Wrong patient population; |
| Idorn 2013 | Exclusion reason: Wrong research question |
| Inuzuka 2010 | Exclusion reason: Duplicate; |
| Inuzuka 2011 | Exclusion reason: Duplicate; |
| Jang 2012 | Exclusion reason: Wrong research question |
| Kehmeier 2016 | Exclusion reason: Wrong research question |
| Kempny 2017 | Exclusion reason: Wrong exercise protocol; |
| Khairy 2013 | Exclusion reason: Wrong research question |
| Kipps 2011 | Exclusion reason: Wrong outcomes; |
| Kipps 2012 | Exclusion reason: Wrong outcomes; |
| Kolcz 2011 | Exclusion reason: Wrong outcomes; |
| Kurokawa 2014 | Exclusion reason: Wrong exercise protocol; |
| Kusljugic 2010 | Exclusion reason: Wrong patient population; |
| Kusljugic 2014 | Exclusion reason: Wrong patient population; |
| Kwok 2000 | Exclusion reason: Wrong patient population; |
| Larsson 2007 | Exclusion reason: Wrong exercise protocol; |
| Le 2017 | Exclusion reason: Wrong patient population; |
| Legendre 2016 | Exclusion reason: Wrong outcomes; -5-7 |
| Madan 2010 | Exclusion reason: Wrong outcomes; |
| Marechaux 2007 | Exclusion reason: Wrong patient population; |
| Matecki 2015 | Exclusion reason: Wrong outcomes; |
| Meijboom 1994 | Exclusion reason: Wrong exercise protocol; |
| Meijboom 1996 | Exclusion reason: Wrong exercise protocol; |
| Melzer 2006 | Exclusion reason: Wrong patient population; |
| Menachem 2019 | Exclusion reason: Wrong research question |
| Menting 2015 | Exclusion reason: Wrong exercise protocol; |
| Mercer-Rosa 2015 | Exclusion reason: Wrong research question |
| Mercer-Rosa 2018 | Exclusion reason: Wrong research question |
| Messika-Zeitoun 2006 | Exclusion reason: Wrong patient population; |
| Michalak 2019 | Exclusion reason: Wrong exercise protocol; |
| Muller 2015 | Exclusion reason: Wrong outcomes; |
| Myridakis 1994 | Exclusion reason: Wrong exercise protocol; |
| Nagdyman 2010 | Exclusion reason: CPET data not reported; |
| Naji 2014 | Exclusion reason: Wrong patient population; |
| Nakano 2007 | Exclusion reason: Wrong research question |
| Nakano 2015 | Exclusion reason: Wrong research question |
| O'Byrne 2013 | Exclusion reason: Wrong research question |
| O'Byrne 2014 | Exclusion reason: Wrong research question |
| Ohuchi 2011 | Exclusion reason: Sub-cohort; |
| Ohuchi 2012 | Exclusion reason: Sub-cohort; |
| Ohuchi 2015 | Exclusion reason: Sub-cohort; |
| Ohuchi 2015 | Exclusion reason: Sub-cohort; |
| Ohuchi 2015 | Exclusion reason: Duplicate; -6- 5: |
| Ono 2016 | Exclusion reason: Wrong research question |
| Ono 2018 | Exclusion reason: Wrong research question |
| Ono 2018 | Exclusion reason: Wrong research question |
| Opotowsky 2018 | Exclusion reason: Wrong research question |
| Palmen 2008 | Exclusion reason: Wrong exercise protocol; |
| Peteiro 2008 | Exclusion reason: Wrong patient population; |
| Prentis 2012 | Exclusion reason: Wrong patient population; |
| Priromprintr 2016 | Exclusion reason: Wrong exercise protocol; |
| Roos-Hesselink 2003 | Exclusion reason: Wrong exercise protocol; |
| Roos-Hesselink 2004 | Exclusion reason: Wrong exercise protocol; |
| Ruys 2013 | Exclusion reason: Wrong exercise protocol; |
| Sadiq 2007 | Exclusion reason: Wrong exercise protocol; |
| Saeed 2018 | Exclusion reason: Wrong patient population; |
| Sajnach-Menke 2017 | Exclusion reason: Diagnostic test; |
| Schulz 2015 | Exclusion reason: Wrong patient population; |
| Sharma 2015 | Exclusion reason: Wrong patient population; |
| Simon 2019 | Exclusion reason: Wrong research question |
| Singh 2017 | Exclusion reason: Wrong patient population; |
| Stefanescu 2014 | Exclusion reason: Wrong research question |
| Stephenson 2010 | Exclusion reason: Wrong exercise protocol; |
| Supino 2013 | Exclusion reason: Wrong patient population; |
| Vaksmann 1990 | Exclusion reason: Wrong exercise protocol; |
| Valente 2013 | Exclusion reason: Protocol paper; -7-9 |
| vandenBosch 2004 | Exclusion reason: Wrong exercise protocol; |
| vandenBosch 2019 | Exclusion reason: Wrong research question |
| Vanderlaan 2012 | Exclusion reason: Wrong patient population; |
| vanderVen 2020 | Exclusion reason: Wrong research question |
| vanRiel 2016 | Exclusion reason: Wrong research question |
| vanSlooten 2016 | Exclusion reason: Wrong research question |
| VanZalen 2019 | Exclusion reason: Wrong patient population; |
| Vida 2019 | Exclusion reason: Wrong research question |
| Vitanova 2019 | Exclusion reason: Wrong research question |
| Waien 1992 | Exclusion reason: Wrong exercise protocol; |
| Williams 2009 | Exclusion reason: Wrong outcomes; |
| Yerebakan 2019 | Exclusion reason: Wrong exercise protocol; |
| Zhang 2017 | Exclusion reason: Wrong patient population; |
| Zybach-Benz 2006 | Exclusion reason: Wrong patient population; |

# Studies included and exercise modality

| DOI | All Studies (including multiple references) | All Studies (combining multiple references)_ | Study meta analysed | SWiM table |
| --- | --- | --- | --- | --- |
| http://dx.doi.org/10.1016/j.repc.2017.09.020 | AguiarRosa 2018 | AguiarRosa 2018  [Treadmill] | AguiarRosa 2018 | Alsaied 2019 |
| http://dx.doi.org/10.1016/j.ijcard.2019.02.018 | AitAli 2019 | AitAli 2019  [Bike] | AitAli 2019 | Bauer 2011 |
| 10.1016/j.amjcard.2019.03.040 | Alsaied 2019 | Alsaied 2019  [Bike] | Atz 2017 | Birkey 2018 |
| 10.1016/j.jacc.2017.03.582 | Atz 2017 | Atz 2017  [Bike] | Babu-Narayan 2014 | Bredy 2018 |
| 10.1161/CIRCULATIONAHA.113.001485 | Babu-Narayan 2014 | Babu-Narayan 2014  [Treadmill] | Brida 2017 | DeFariaYeh 2018 |
| http://dx.doi.org/10.1007/s00246-011-0008-7 | Bauer 2011 | Bauer 2011  [Treadmill] | Buys 2012 | Egbe 2016 |
| http://dx.doi.org/10.1007/s00246-018-1918-4 | Birkey 2018 | Birkey 2018  [Treadmill] | Chun-AnChen 2014 | Lin 2015 |
| http://dx.doi.org/10.1093/ehjqcco/qcx031 | Bredy 2018 | Bredy 2018  [Treadmill] | Cunningham 2017 | Lui 2011 |
| http://dx.doi.org/10.1136/heartjnl-2016-310571 | Brida 2017 | Brida 2017  [Treadmill] | Diller 2006 | Lytrivi 2013 |
| http://dx.doi.org/10.2143/AC.67.4.2170682 | Buys 2012 | Buys 2012  [Bike] | Diller 2010 | Muller 2018 |
| 10.1249/MSS.0b013e31829f8326 | Chun-AnChen 2014 | Chun-AnChen 2014  [Bike] | Diller 2019 | Ohuchi 2013 |
| 10.1016/j.ahj.2017.04.009 | Cunningham 2017 | Cunningham 2017  [Bike and treadmill] | Dimopoulos 2006 | Ohuchi 2019 |
| http://dx.doi.org/10.1136/heartjnl-2017-312572 | DeFariaYeh 2018 | DeFariaYeh 2018  [Bike] | Egbe 2017 | Shafer 2018 |
| http://dx.doi.org/10.1016/j.jacc.2006.05.051 | Diller 2006 | Diller 2006  [Treadmill] | Egbe 2019 | Srivastava 2019 |
| http://dx.doi.org/10.1093/eurheartj/ehq356 | Diller 2010 | Diller 2010  [Bike] | Fernandes 2011 |  |
| http://dx.doi.org/10.1093/eurheartj/ehy915 | Diller 2019 | Diller 2019  [Not reported] | Giardini 2007a |  |
| http://dx.doi.org/10.1161/CIRCULATIONAHA.105.594218 | Dimopoulos 2006 | Dimopoulos 2006  [Treadmill] | Giardini 2007b |  |
| http://dx.doi.org/10.1016/j.ijcard.2016.06.209 | Egbe 2016 | Egbe 2016  [Not reported] | Giardini 2009 |  |
| http://dx.doi.org/10.1016/j.ijcard.2017.02.140 | Egbe 2017 | Egbe 2017  [Treadmill] | Goncalves 2019 |  |
| http://dx.doi.org/10.1016/j.amjcard.2019.05.048 | Egbe 2019 | Egbe 2019  [Not reported] | Heng 2017 |  |
| http://dx.doi.org/10.1111/j.1747-0803.2011.00500.x | Fernandes 2011 | Fernandes 2011  [Bike and treadmill] | Inai 2005 |  |
|  | Giardini 2007 | Giardini 2007  [Bike] | Inuzuka 2012 |  |
| http://dx.doi.org/10.1016/j.ahj.2007.05.009 | Giardini 2007 | Giardini 2007  [Bike] | Kowalik 2018 |  |
| http://dx.doi.org/10.1016/j.jacc.2009.02.005 | Giardini 2009 | Giardini 2009  [Bike and treadmill] | Muller 2015 |  |
| http://dx.doi.org/10.1017/S1047951119002361 | Goncalves 2019 | Goncalves 2019  [Treadmill] | Nathan 2015 |  |
| http://dx.doi.org/10.1161/CIRCULATIONAHA.117.027402 | Heng 2017 | Heng 2017  [Treadmill] | Ohuchi 2013 |  |
| http://dx.doi.org/10.1016/j.ahj.2004.10.030 | Inai 2005 | Inai 2005  [Bike] | Ohuchi 2014 |  |
| https://dx.doi.org/10.1161/CIRCULATIONAHA.111.058719 | Inuzuka 2012 | Inuzuka 2012  [Treadmill] | Radojevic 2013 |  |
| http://dx.doi.org/10.1016/j.cjca.2018.07.002 | Kowalik 2018 | Kowalik 2018  [Treadmill] | Rydman 2015 |  |
| http://dx.doi.org/10.1111/chd.12229 | Lin 2015 | Lin 2015  [Bike] | Sieweke 2019 |  |
| http://dx.doi.org/10.1007/s11886-011-0183-4 | Lui 2011 | Lui 2011  [Treadmill] | Tsai 2016 |  |
| 10.1161/CIRCULATIONAHA.110.953380 | Lui 2011 | Lytrivi 2013  [Bike and treadmill] | Valente 2014 |  |
| http://dx.doi.org/10.1161/CIRCHEARTFAILURE.112.000103 | Lytrivi 2013 | Muller 2015  [Treadmill] | Van Der Bom 2013 |  |
| http://dx.doi.org/10.1016/j.ijcard.2015.05.174 | Muller 2015 | Muller 2018  [Bike] | Yogeswaran 2018 |  |
| 10.1016/j.jjcc.2017.05.005 | Muller 2018 | Nathan 2015  [Bike] |  |  |
| http://dx.doi.org/10.1161/CIRCHEARTFAILURE.114.001749 | Nathan 2015 | Ohuchi 2013  [Treadmill] |  |  |
| https://dx.doi.org/10.1111/j.1747-0803.2012.00717.x | Ohuchi 2013 | Ohuchi 2013  [Treadmill] |  |  |
|  | Ohuchi 2013 | Ohuchi 2014  [Treadmill] |  |  |
| http://dx.doi.org/10.1016/j.ijcard.2014.03.001 | Ohuchi 2014 | Ohuchi 2019  [Treadmill] |  |  |
| http://dx.doi.org/10.1016/j.ijcard.2018.06.067 | Ohuchi 2019 | Radojevic 2013  [Treadmill] |  |  |
| http://dx.doi.org/10.1016/j.ijcard.2011.06.047 | Radojevic 2013 | Rydman 2015  [Treadmill] |  |  |
| https://dx.doi.org/10.1161/CIRCIMAGING.114.002628 | Rydman 2015 | Shafer 2018  [Bike] |  |  |
| http://dx.doi.org/10.1111/chd.12661 | Shafer 2018 | Sieweke 2019  [Bike] |  |  |
| 10.1017/S1047951119000258 | Sieweke 2019 | Srivastava 2019  [Treadmill] |  |  |
| http://dx.doi.org/10.1111/chd.12698 | Srivastava 2019 | Tsai 2016  [Treadmill] |  |  |
| http://dx.doi.org/10.1177/2047487315623405 | Tsai 2016 | Valente 2014  [Bike and treadmill] |  |  |
| https://dx.doi.org/10.1136/heartjnl-2013-304958 | Valente 2014 | VanDerBom 2013  [Bike] |  |  |
| http://dx.doi.org/10.1016/j.jacc.2013.06.026 | VanDerBom 2013 | Yogeswaran 2018  [Treadmill] |  |  |
| http://dx.doi.org/10.1016/j.cjca.2018.02.004 | Yogeswaran 2018 |  |  |  |

# Risk of Bias

| **Study** | **Study participation** | **Supporting evidence** | **Study attrition** | **Supporting evidence** | **Prognostic factor measurement** | **Supporting evidence** | **Outcome measurement** | **Supporting evidence** | **Study confounding** | **Supporting evidence** | **Statistical analysis and reporting** | **Supporting evidence** | **Overall, ROB** |
| --- | --- | --- | --- | --- | --- | --- | --- | --- | --- | --- | --- | --- | --- |
| AguiarRosa 2018 | Moderate | There was a bias in patient selection, favouring more symptomatic patients and those in which it is important not to rely only on self-reported functional capacity. This could explain the severity seen in the shunt subgroup, in which there was a large proportion of Eisenmenger syndrome. | Moderate | No evidence reported of loss to follow up. Only in clinic follow up and not clearly reported | Low | Well described and validated protocols and analysis | Moderate | No description of how this was undertaken | Moderate | No attempt to control for confounders with multivariate cox regressions | Moderate | No information on how the prognostic factor was handled. Potential for selective reporting with no hypothesis drive research questions. No predefined CPET parameters of interest. Lack of detail in why multivariate modelling was not used. | Moderate |
| AitAli 2019 | Low | Inclusions and exclusion criteria and source explained. Specific population targeted. | Low | There was only a small percentage of prognostic factor data loss and this was reported. | Low | Well described and validated protocols and analysis | Low | Follow-up data were obtained from at least one of the following sources: review of hospital record, personal communication with patient's physician and review of the patient's chart, telephone interview, or patient visits to staff physicians at regular intervals in the out-patient clinic | Low | CMR TTE BNP ECG age all accounted for. | Low | Well described and documented analysis. Lots of justification and supporting references | Low |
| Alsaied 2019 | Moderate | Large multicentre with specific population, clear inclusion/exclusion. Not everyone had CPET | Moderate | No evidence reported of loss to follow up. Only in clinic follow up and not clearly reported | Low | Well described and validated protocols and analysis | Moderate | Clear definitions but no description of how this was undertaken | Low | Demographics, Imaging, and clinical status was collected | Low | Well described and documented analysis. Lots of justification and supporting references | Moderate |
| Atz 2017 | Low | Large multicentre with specific population, clear inclusion/exclusion | Low | 20% reduction from Fontan 1. Subjects were younger than those who were eligible but declined (21.1 3.5 years vs. 22.0 3.4 years; p ¼ 0.01). Sex, race, ethnicity, anatomic diagnosis, and type of Fontan performed were not different. No differences were identified in any cardiac characteristics or laboratory measures assessed. | Low | Well described and validated protocols and analysis | Low | Vital status was assessed annually in all subjects by direct contact or review of the Social Security death index for subjects who could not be located. | Low | CPET parameters were mostly non-significant and they did not perform multivariate cox regressions. | Low | Well described and documented analysis. Lots of justification and supporting references. Statistical assumptions were explored. | Low |
| Babu-Narayan 2014 | Low | Moderate sized population well described. Specific population reducing noise. | Low | No evidence reported of loss to follow up | Moderate | Poorly described protocols and analysis. No reference to blinding | Low | Office of national statistics which logs all UK deaths | Low | Important confounders are measured | Moderate | Analysis is appropriate with sufficient data. No evidence of selective reporting. No multivariate cox on all-cause mortality only short-term mortality | Moderate |
| Bauer 2011 | Moderate | Small sample from one centre. | Moderate | No data on those eligible vs those included | Moderate | 2 different protocols, 2 different metabolic carts. Not all people had direct gas analysis and no data on which participants missed the vo2 data | Moderate | Only reviewed medical records, events may have occurred in other settings (i.e. abroad) not captured. | Moderate | No multivariate, limited parameters. Do not control for all possible confounders | Moderate | A reasonable analysis strategy. Described in the methods. But very basic | Moderate |
| Birkey 2018 | Moderate | Only 75 people included due to stringent criteria. Potentially not a representative population. | Low | No evidence reported of loss to follow up | Moderate | Well described and validated protocols. Analysis was not described and no mention of blinding etc. | Low | Medical record review is appropriate for peri-operative outcomes | Moderate | No statistical analysis took place. Offered limited peri-operative results which can influence outcomes (e.g. bleeds/reoperation due to surgical error). | Low | No survival analysis took place due to lack of events | Moderate |
| Bredy 2018 | Low | large cohort >2000 from royal Brompton. Well described | Low | No evidence reported of loss to follow up | Low | All points have been described in text and are appropriate. | Low | Office of national statistics which logs all UK deaths | Low | step wise multiple regression. Stats driven entered models. | low | Well described and documented analysis. Lots of justification and supporting references. Statistical assumptions were explored. | Low |
| Brida 2017 | Low | large cohort >2000 from royal Brompton. Well described | Low | 13% of people did not have CPET data | Low | All points have been described in text and are appropriate. | Low | Office of national statistics which logs all UK deaths | Moderate | all univariate predictors were entered into final model. NYHA measured but not cardiac function - may influence | Low | One of only few papers to check stats assumptions. | low |
| Buys 2012 | Low | Small tertiary centre cohort. Inclusion and exclusion criteria well stated. | Low | No evidence reported of loss to follow up | Low | All points have been described in text and are appropriate. | Low | Low 3 step process to capture all information, contact patients, routine follow up and medical records | Low | Only presented multivariate associations including echo ecg and age, important clinical factors | Low | No detail on checking statistical assumptions or how multivariate modelling was conducted. Unlikely to affect the results | Low |
| Chen 2014 | Low | All points have been described in text and are appropriate. Population age is low unsure if this is representative of global Fontan. | Low | No patients lost to follow up | Low | All points have been described in text and are appropriate. | Low | Participants were observed…no patient was lost to follow-up; all cardiac events could be recorded.' | Moderate | important confounders are measured but not 'all', explicit definitions are not given. OUES is not corrected by other fitness values e.g. peak VO2. | Moderate | Prognostic effect for maximal prognostic factors has been described but no numerical data has been presented including supplementary materials. Statistical methods are possibly underpowered | Moderate |
| Cunningham 2017 | Moderate | Large sample well described. All points have been described in text and are appropriate. Only people with serial cpets - fits research question but not a representative sample? | Moderate | Not applicable to a retrospective analysis. All cases that met inclusion criteria were analysed. Loss to follow up reasons not provided but only small numbers | Low | All points have been described in text and are appropriate. | Moderate | Well defined and described outcomes. Only hospital charts, possible events missed | Low | Multivariate stats were performed, with important confounders being addressed. Furthermore, the change in VO2 was analysed against various clinical characteristics which were non-significant. The number of covariates included in any model was limited to 1 per 10 events. | Low | Analysis is appropriate with sufficient data. No evidence of selective reporting | Moderate |
| DeFaria Yeh 2017 | Moderate | Sample size 147, approx. evenly distributed in subgroups. Location/source and descriptions provided. Only people with RadioNuec included potentially not a representative sample? | Low | Where data loss had taken place, this was fully described and unlikely influence results | Low | Investigators blinded. CPET protocol described in supp materials | Moderate | Only patient charts. Positive - Cardiac surgery was not included in the composite outcome, as CPET may influence decision regarding timing of surgery. | Low | Adjusted for several other confounders including peak VO2, age, sex, height, weight, RV pathology group, QRS duration, NYHA class | Low | Would be good to see a multivariate table of coefficients and P values. However, all analysis methods are well documented and appropriate | Moderate |
| Diller 2006 | Moderate | Large sample 700+ mix of all ConHD lesions. | Low | No patients reported to be lost to follow up | Low | All points have been described in text and are appropriate. | Low | All-cause mortality reducing the risk of bias due to a death being miss reported. Office of national stats | Moderate | Medication NYHA and other fitness parameters controlled. No cardiac function data. | Low | Analysis is appropriate with sufficient data. No evidence of selective reporting | Moderate |
| Diller 2010 | Low | Large multicentre sample well described | Low | No persons lost to follow up | Low | All points have been described in text and are appropriate. | Low | Regular follow ups with patients, hospital records and primary care records searched | Moderate | Bivariate analysis controlled for age, medication, and type of TCPC. No cardiac data. | Moderate | Analysis is appropriate with sufficient data. No evidence of selective reporting. Only bivariate methods. | Moderate |
| Diller 2019 | Low | Very large cohort (10k) representative of ConHD in the UK | Low | All UK deaths are recorded in the ONS database. | Moderate | No information on what CPET protocols were used to measure peak VO2. Unsure patient numbers on CPET and why | Low | Data on overall mortality were retrieved from the Office for National Statistics, which registers all UK deaths | Low | Due to the large sample, 7 multivariate confounders were added to the model using AIC methods. | Low | Stats assumptions were checked. Appropriate statistical methods were taken | Low |
| Dimopoulos 2006 | Moderate | Only patients with CPET included.? Representative Large cohort >500, well varied and described. Exclusion criteria was not particularly well outlined | Low | Not applicable to a retrospective analysis. All cases that met inclusion criteria were analysed. | Low | Protocols with documented Reliability and validity were used | Low | ONS - Mortality was not well defined (implied all-cause). Method of outcome was good. | Moderate | Only used CPET prognostic factors and these were limited. | Moderate | Analysis is appropriate with sufficient data. No evidence of selective reporting. Poor reporting on stepwise method and in tables. | Moderate |
| Egbe 2016 | Moderate | Small sample n=75. Conducted in tertiary Fontan referral centre and as a result the clinical characteristics of our Fontan cohort may not be representative of the Fontan population in other smaller centres due to referral bias. May impact generalisability. | Low | there was no difference in the clinical characteristics and baseline CPET data between the patients with loss of follow up and those that had CPET after FC. | Low | Well validated methods (Naughton protocol). | Low | Well defined and described outcomes. Causes of death were multisystem organ failure (n = 8), respiratory failure (n = 1) and cardiac arrest from ventricular fibrillation (n = 1). | Moderate | Adjusted for several other cpet and clinical confounders. In hospital events were possibly not accounted for | Low | All outcomes reported and description of the model provided. | Moderate |
| Egbe 2017 | Moderate | Large sample size well described. Only collected those with CPET data | Moderate | 41 patients excluded because of loss of follow-up. No difference in the clinical characteristics and baseline CPET data between the lost to follow up and non-lost to follow up | Low | Well validated methods (Bruce + Naughton protocol). | Moderate | (CAE) defined as death or cardiac surgery. The patients were identified from the medical records using free text search software (Advanced Cohort Explorer). No ONS data | Low | Adjusted for several other cpet and clinical confounders | Low | All outcomes reported and description of the model provided. | Moderate |
| Egbe 2019 | Low | Large sample size well described. | Low | All patients followed up. | High | No information on what CPET protocols were used. 61% of participants have data loss for CPET, however imputation methods are reported. unclear how many in the mortality/transplant group had CPET data. | High | Well defined and described outcomes. | high | Adjusted for several other cpet and clinical confounders | High | No sufficient reporting. unclear how many in the mortality/transplant group had CPET data. | High |
| Fernandes 2011 | Low | Large sample of Fontan patients. Description of source, inclusion/exclusion and baseline status presented. CPET is usual care | Moderate | No patients reported to be lost to follow up. Lack of reporting | Low | 8 patients excluded due to sub max effort (RER<1.05). However, demographic, and clinical features of the study cohort did not differ significantly from those of the eight patients with who did not meet inclusion criteria. Referenced Wasserman textbook with no clear description of protocols used (i.e. ramp, step, Bruce etc.). CPET parameters were well described, valid and reliable. | Moderate | Data regarding morbidity and mortality events were derived from a review of medical records in 2010 | Moderate | Only time variables accounted for no medication or other clinical parameters "Each CPX parameter was considered for inclusion in a multivariate survival model that also adjusted for potential confounding by patient age at CPX, age at initial Fontan procedure, and time from initial Fontan procedure to CPX. Variables with multivariate P-values < 0.05 were retained." | Low | Sufficient reporting and methodologies used. No selective reporting | Moderate |
| Giardini 2009 | Low | Large sample of TGA patients. Description of source, inclusion/exclusion and baseline status presented. Multicentre | Low | . Follow-up was complete for all patients | Low | Well described validated protocols. Same in all participants - issues with cycle vs. treadmill ergometry but this was addressed | Low | 3 stages to collect this data, routine follow up, medical records and phone call with primary physician | Low | Controlled for multiple factors. All univariate predictors were entered into the final model. | Low | Well reported and described. | Low |
| Giardini 2007 | Moderate | Large sample of ACHD, source and baseline data described. exclusion criteria are not well described. Potentially targeted though only with CPET | Low | No patients reported to be lost to follow up. | Low | CPET well described however 'The technical details of measurement of peak Vo2 and VE/Vco2 slope were previously published.14,15. These papers describe analysing the VE/VCo2 slope differently therefore it is unclear. Assumed the slope is measured until peak exercise and not the RCP. | Low | 3 stages to collect this data, routine follow up, medical records and phone call with primary physician | Moderate | Controlled for multiple factors. All univariate predictors were entered into the final model. Mixed population no cardiac function variables | Low | Well reported and described. | Moderate |
| Giardini 2007 ToF | Moderate | Large sample of a well described ToF cohort. Exclusion criteria is not well described. | Low | No patients reported to be lost to follow up. | Low | Two different investigators blinded to other test results and patient outcomes collected exercise and imaging and follow-up data. | Low | Two different investigators blinded to other test results and patient outcomes collected exercise and imaging and follow-up data. Stages to collect this data, routine follow up, medical records and phone call with primary physician | Low | Controlled for multiple factors including heart function. All univariate predictors were entered into the final model. | Low | Well reported and described. | Low |
| Goncalves 2019 | Low | Small sample in one centre. Mix of CC-TGA and senning/mustard. Well described. Patients were consecutive referred for CPET. Robust protocol for inclusion. | Low | No one lost to follow, explicitly described | Low | Very well described. Protocol is valid | Low | Well described. Data were obtained from the outpatient clinic visits and medical charts review and were complemented with a standardised telephone interview to all patients at the end of follow-up | Moderate | No bi-or multivariate regressions controlling for other factors. Did collect a lot of confounding data. | Moderate | Well reported and described. Unfortunately, limited events and cannot adequately analyses multivariate. | Moderate |
| Heng 2017 | Low | Prospective recruitment, well described and specific patient population | Low | No patients reported to be lost to follow up. | Moderate | Protocol is valid and described. No blinding. Lack of description on criteria and analysis. | Low | Method for follow up not well described. This centre usually uses the office for national stats, but not stated explicitly. | Moderate | No bi-or multivariate regressions controlling for other factors | Moderate | Stats assumptions were checked. Appropriate statistical methods were taken | Moderate |
| Inai 2005 | Low | 50 consecutive patients recruited. Prospective nature. | Moderate | No patients reported to be lost to follow up. Lack of reporting | Moderate | Protocol is valid and described. No blinding. Lack of description on criteria and analysis. | Moderate | Reviewed their clinical record. Maybe missed other data not recorded at the institution. | Moderate | all univariate predictors were entered into final model. Lack of other confounders accounted for. | Moderate | No description on multivariate analysis method. Or checking assumption. Selective reporting - gave coefficients rather than HR. | Moderate |
| Inuzuka 2012 | Moderate | Large sample over many years, mix of all lesions. Only CPET | Low | No patients reported to be lost to follow up | Low | Valid and reliable protocols. Extremely well described and referenced. No major differences in the predictive value of these 2 methods of calculating V˙ E/V˙ CO2 slope were found. | Low | All-cause mortality reducing the risk of bias due to a death being miss reported. Office of national stats | Moderate | Medication and cyanosis controlled for. No cardiac function confounders | Low | Analysis is appropriate, highly detailed with sufficient data. No evidence of selective reporting. | Moderate |
| Kowalik 2018 | Low | Inclusions and exclusion criteria and source explained. Specific population targeted. Prospective | Low | No patients reported to be lost to follow up. Follow up at last clinic appt. | Moderate | Protocol is valid and described. No blinding. Lack of description on criteria and analysis. | Low | Reviewed their clinical record and were reviewed in clinic | Low | step wise multiple regression. Stats driven entered models. Echo and ECG | Moderate | Analysis is appropriate, highly detailed with sufficient data. No evidence of selective reporting. However underpowered only used one variable for each group. | Moderate |
| Lin 2015 (Swim) | High | Multicentre well described. Patients who did not have all the parameters required to calculate the HFSS, including various laboratory values, were excluded. | Moderate | 261 missing CPET data which informs the composite score | High | Lack of standardisation between centres. Calculated score excluded 160 patients without CPET results. | Moderate | Different methods between centres. One centre only hospital record other centre was linked with national stats | Low | Composite prognostic factor predicting outcome | High | No time to event analysis, did not handle censored patients or multivariate analysis | High |
| Lui 2011 | Moderate | 9 centres across north America. Inclusion and exclusion well described. However, highly likely there was a selection bias. 1% of population have ConHD and only 83 people were identified from 9 hospitals. | Low | No patients reported to be lost to follow up. | Low | Well described validated protocols. | Low | Not well described. But short-term outcomes chances of capturing events are very high | Low | Well reported and described. | Moderate | Limited events so only performed limited multivariate stats. | Moderate |
| Lytrivi 2013 | Low | Inclusions and exclusion criteria and source well explained. Specific population targeted. | Low | No patients reported to be lost to follow up. Prospective. Not possible to loss HT patient | Low | Well described validated protocols. Analysis methods clearly defined | Low | Clear definitions and followed up throughout study | Low | Not performed at single ventricle as univariate was not significant | Low | Well reported and described. No evidence of selective reporting | Low |
| Muller 2018 | Moderate | Large population but not adequately described. CPET only | Moderate | No patients reported to be lost to follow up. No sources reported or how complete it is | Low | Well described validated protocols. Analysis methods clearly defined | Moderate | No information given | Moderate | Controlled for multiple clinical factors. But no cardiac function | Moderate | Lack of information on multivariate selection process | Moderate |
| Muller 2015 | Low | Large multi-centre. Inclusions and exclusion criteria and source well explained. Specific population targeted. | Low | No patients reported to be lost to follow up. | Low | Well described validated protocols. Analysis methods clearly defined | Low | Low 3 step process to capture all information, contact patients, routine follow up and medical records | Low | Controlled for multiple clinical factors | Low | Well reported and described. No evidence of selective reporting | Low |
| Nathan 2015 | Moderate | Large cohort of Fontan patients at a single centre. Inclusion and source well described | Low | 13 patients lost to follow up ~5%. No description of why lost to follow up. But this is reported and a low loss to follow up rate | Low | Well described validated protocols. Analysis methods clearly defined. EOV clearly defined. | Moderate | reviewed their clinical record. Maybe missed other data not recorded at the institution. Little detail. | Low | Controlled for multiple clinical factors | Low | Well reported and described. | Moderate |
| Ohuchi 2019 | Low | Large cohort of Fontan patients at a single centre. Inclusion and source are described. Only serial cpet and those without procedures. Representative? | Moderate | No patients reported to be lost to follow up. Lack of reporting | Moderate | Protocol is valid and described. No blinding. Lack of description on criteria and analysis. Different approaches and intervals | Moderate | No information given | Moderate | No multivariate stats | High | How they defined their groups, change variables. Chose specific groups to find significance. Little description of methods/assumptions etc. | High |
| #1862 - Ohuchi 2014 | Low | Large cohort of Fontan patients at a single centre. Inclusion and source are described. Imply cpet is routine | Moderate | No patients reported to be lost to follow up. Lack of reporting | Low | Protocol is valid and well described. VE/VCo2 analysed to rcp. 16 people do not have CPET data and this is not described | Moderate | No information given | Low | Controlled for multiple clinical factors | Low | Reported satisfactory. | Moderate |
| #3904 - Ohuchi 2013 | Moderate | Prospective sample. Diagnosis not well defined nor inclusion exclusion criteria. | Low | No patients reported to be lost to follow up. | Moderate | Lack of detail regarding protocol and analysis method | Moderate | No information given. Assumed medical records searched | Moderate | Controlled for multiple clinical factors. No cardiac | Moderate | All outcomes reported and description of the model provided. All significant predictors entered the final model, then optimised the model using cut offs. Introducing bias using ROC and multivariate. | Moderate |
| #3905 - Ohuchi 2013 (preg) | Moderate | Small sample, highly likely referral bias. Wide variety of diagnoses | Low | No patients reported to be lost to follow up. Short term. | Low | Well described validated protocols. Analysis methods clearly defined | Low | No information given, but in short term follow up a low risk. Inferred chart review | Moderate | No multivariate stats. Little confounders | Moderate | Well reported and described. Low number of patients did not do adequate adjustments | Moderate |
| Radojevic 2013 | Moderate | Specific group from Royal Brompton well described. Only patients with cpet | Low | No patients reported to be lost to follow up. | Low | Well described validated protocols. Analysis methods clearly defined | Low | Office for national stats. Entered medical records prospectively | Moderate | AIC criteria, to create multivariate models. Little to no cardiac variables | Moderate | Well reported and described. Little justification of the cut points used, e.g. ROC analysis. | Moderate |
| Rydman 2015 | Low | Specific group from Royal Brompton well described. | Low | No patients reported to be lost to follow up. | Low | Well described validated protocols. Analysis methods clearly defined | Low | Office for national stats. Entered medical records prospectively | Low | Bivariate cox to compare LGE with VO2 | Moderate | Well reported and described. Only used bivariate, although appropriate, low numbers. | Moderate |
| Shafer 2018 | high | Only CPET patients who died selected first, then matched with survivors | Moderate | Not reported | Moderate | Not well described VE/VCO2 slope | Moderate | Not well described. Unsure if transplant if apart of outcome. Only searched hospital records but for all-cause mortality this should suffice to pick up all events | High | Controlled for multiple factors including participant characteristics and CPET data. No cardiac outcomes. Unsure how patient matching was done. | Moderate | Little justification provided or references. Overall acceptable methods | High |
| Sieweke 2019 | Low | Large cohort from a single centre. Well described | Moderate | No patients reported to be lost to follow up/missing data. Not well reported | Moderate | Protocol is unclear. Lack of description on criteria and analysis. | Moderate | Well defined and described outcomes. Only Hospital records searched | Low | Controlled for multiple factors including participant characteristics echo/imaging and CPET data | Low | Well reported and described. | Moderate |
| Srivastava 2019 | Low | all patients who had undergone the Mustard operation for DTGA between 1970 and 1986 at Riley Hospital for Children at Indiana University Health | Low | Well described: For the current study, we again recruited from this cohort to undergo testing from June 2013 to March 2017 (Time 3). Of the patients who had participated at Time 2, four patients had died, four patients had received cardiac trans‐ plantation (including one patient who subsequently died), and four were either lost to follow‐up or declined to participate, leaving 24. | High | Protocol is unclear. Lack of description on criteria and analysis. Comparing VO2 mL.Kg.min between child, young adult, and early adult, which does not usually correct for body size well (RQ warrants allometric/multilevel modelling). Over reliance on exercise duration rather than physiological components. | Low | No information given in text but refers to methods papers | Moderate | No multivariate stats | High | Little description of methods/assumptions etc. | High |
| Tsai 2016 | Moderate | Only children with cpets. Specific paediatric cohort. Well described inclusion/exclusion and participant characteristics | Moderate | Anyone who did not attend outpatients was excluded as a loss to follow up. Yet no data on how many were excluded or why they did not attend. | Low | Well described validated protocols. Analysis methods clearly defined | Moderate | No definition of cardiac hospitalisation and no reporting of how many events and/or what events. However, 'all subjects were regularly followed up for cardiac events after exercise testing. All subjects’ medical records were reviewed. Those who had not attended the outpatient clinic in the last two years were defined as lost for follow-up and were excluded from the study.' | Low | All univariate predictors were entered into the model (inclusive of CPET and medical). No cardiac function data | Moderate | ROC curves to cut off. Confidence intervals not reported and very wide when calculated. Stretched multivariate. Well reported and described. | Moderate |
| Valente 2014 | Low | Large multicentre with published protocol | Low | Published protocol with recruitment protocol. Any loss to follow up has been documented clearly. Circa 40% of people did not have CPET data but this was not their primary outcome, and still had a large >550 cohort with CPET data | Low | Well described validated protocols. Analysis methods clearly defined in the protocol document | Low | Large multinational study, adequate definition, and methods | Low | Stepwise regression with Harrell’s c-index and Nagelkerke’s R2. | Low | Extremely well described and referenced analysis plan and no deviations in main paper, Plus calculated stats power | Low |
| VanDerBom 2013 | Low | Large multicentre with published protocol | Low | No patients reported to be lost to follow up/missing data | Low | Sufficient reporting - not greatly described but b-f are addressed in the QUIPS checklist | Low | Sufficient reporting - not greatly described but a and c are addressed. B is implied. | Low | Multiple clinical factors accounted for, stepwise regression based on clinical ease, NYHA through to MRI | Low | Extremely well described and referenced analysis plan and no deviations in main paper, Plus calculated stats power | Low |
| Yogeswaran 2018 | Moderate | Specific groups targeted and resented well. Source and inclusion criteria well described. CPETs only and those with accurate data | Low | No patients reported to be lost to follow up/missing data | Low | Well described validated protocols. Analysis methods clearly defined | Moderate | Sufficient reporting - not greatly described but all points in QUIPS covered. Not greatly reported the source of outcome. | Low | 5 Multivariate models build with clinical factors incorporated | Low | Extremely well described and referenced analysis plan and no deviations in main paper, Plus calculated stats power | Moderate |

# Stata code

Primary analysis:

meta set loghr se, random(dlaird) studylabel(study) studysize(n) eslabel(Hazard ratio)

meta summarize, subgroup( Interaction ) eform(Hazard ratio)

meta forestplot, subgroup( Interaction Interaction ) eform(Hazard ratio) xline(1)

meta funnelplot

Each CPET parameter analysis (ConHD subgroup analysis):

meta set loghr se, random(dlaird) studylabel(study) studysize(n) eslabel(Hazard ratio)

meta summarize, subgroup(typeofconhd) eform(Hazard ratio)

meta forestplot, subgroup(typeofconhd) eform(Hazard ratio) xline(1)

Each CPET parameter analysis (Unit subgroup analysis):

meta set loghr se, random(dlaird) studylabel(study) studysize(n) eslabel(Hazard ratio)

meta summarize, subgroup(pfunit) eform(Hazard ratio)

meta forestplot, subgroup(pfunit) eform(Hazard ratio) xline(1)

Univariate vs. Multivariate head to head analysis:

meta set LogHR_stata SE_stata , random(dlaird) studylabel( Study ) studysize(n) eslabel(Hazard ratio)

meta forestplot, subgroup( ConHDPrognosticfactor ConHDPrognosticfactor ) eform(Hazard ratio) noomarker crop(0.03 2) xline(1)

meta set Adjusted_LogHR_stata Adjusted_SE_stata , random(dlaird) studylabel( Study ) studysize(n) eslabel(Hazard ratio)

meta forestplot, subgroup( ConHDPrognosticfactor ConHDPrognosticfactor ) eform(Hazard ratio) noomarker crop(0.03 2) xline(1)

Tips analyses:

- To produce a combination variable (i.e. ‘ConHDPrognositcfactor’) we used ‘=CONCAT’ in excel.
- This combination variable was entered twice into the subgroup analysis section in the forest plot otherwise Stata would not produce a plot due to the plot size. By entering it twice it collapses the study names allowing a summary plot to be made.

# SWiM table 1.

| Study | Aim | Methods | Results | Risk of Bias |
| --- | --- | --- | --- | --- |
| Alsaied 2019 (1) | Assess the associations of Fontan baffle stroke volume with peak VO2 and Fontan failure (FF). | *Type of study -* Multicentre (n=6), retrospective review (1999-2017)  *Patients -* Patients with atriopulmonary or lateral tunnel Fontan circulations  *Inclusion criteria -* Patient must have CMR and CPET data.  *Outcome -* Fontan failure; defined as death, listing for transplantation, heart failure symptoms requiring medications, or peak VO2 below 16 ml/kg/min.  *Statistics -* Logistic regression. | 107 patients included with a mean time since Fontan of 16 years. Peak VO2 was a predictor in a univariate model (parameter estimate -0.12±0.04, p=0.001). Peak VO2 did not remain in the multivariate model. | Moderate |
| Bauer 2011 (2) | Assess the associations between peak heart rate and peak VO2 and their links to adverse outcomes. | *Type of study* - Single centre retrospective review (2004-09).  *Patients* – Single ventricle (SV) patients  *Inclusion criteria* - NR  *Outcome* – Incidence of major adverse cardiac events (MACE) within 3 years of index CPET  *Statistics* - Logistic regression | 45 SV patients with a mean age of 32.7 ± 9.0 were included. Percentage of max heart rate (%peakHR) (coefficient -0.1242, p= 0.0019) and peak VO2 (coefficient 0.1553, p= 0.0156)) were predictive of future MACE. | Moderate |
| Birkey 2018 (3) | Assess CPET variables that may identify ConHD patients at risk of post-operative morbidity and mortality. | *Type of study -* Single centre retrospective review (2005-15)  *Patients* – Patients with ConHD who had major cardiothoracic surgery  *Inclusion criteria –*Cardiopulmonary bypass during surgery; CPET within 12 months of surgery.  *Outcome –* Post operative events requiring significant medical intervention  *Statistics –* Correlation | 75 patients (56% male) included. Hospital length of stay correlated with VE/VCO2 slope (P=0.008). Duration of intubation correlated with several CPET parameters. Logistic regression was not performed. | Moderate |
| Bredy 2018 (4) | Validate NYHA compared to CPET in ConHD and mortality. | *Type of study -* Single centre retrospective review (2005-15)  *Patient –* Adults with ConHD  *Inclusion criteria –* Patients who had aCPET between 05-15 with no event between their clinic appointment and CPET.  *Outcome –* Mortality  *Statistics –* Cox proportional hazard | NYHA functional class was a strong independent predictor of death (covariates: age, sex, cyanosis, systemic/sub-pulmonary ventricular function, and complexity). Peak VO2 was also a significant independent predictor but not the VE/VCO2 slope. | Low |
| DeFaria Yeh 2018 (5) | Assess whether RV reserve impairment predicts exercise capacity and medium-term cardiovascular outcomes | *Type of study -* Single centre retrospective review (2011-14)  *Patient –* Adult ConHD affecting  the RV in a sub-pulmonary position or with systemic physiology.  *Inclusion criteria –* All patients with CPET and radionuclide ventriculography.  *Outcome –* HF, arrhythmia, cardiac transplantation or death.  *Statistics –* Cox proportional hazard models | CPET was not used as an index prognostic factor. | Moderate |
| Egbe 2016 (6) | Determine the role of pre-operative CPET in risk stratification of patients undergoing Fontan conversion. | *Type of study -* Single centre retrospective review (1994-2014)  *Patient –* People who underwent Fontan conversion (FC).  *Inclusion criteria –* CPET performed within 24 months prior to FC  *Outcome –* Perioperative mortality  *Statistics –* Cox proportional hazard | Pre-operative peak VO2 of less than 14 mL.kg-1.min-1 wasassociated with peri-operative mortality (hazard ratio [HR] 3.83, 95% CI 2.31 to 4.79, p<0.001). After controlling for moderate to severe AV valve regurgitation, sex, and age, the adjusted HR remained a substantial predictor of peri-operative mortality (HR 3.74, 95% CI 2.63 to 4.86, p<0.001). | Moderate |
| Lin 2015 (7) | Assess the Heart Failure Survival Score (HFSS) predicts adverse outcomes in adults with ConHD. | *Type of study –* multicentre retrospective (2005-13).  *Patient –* adults with moderate or complex ConHD.  *Inclusion criteria –* Must have completed CPET.  *Outcome –* death, cardiac transplant or ventricular assist device, arrhythmias, CV admissions, and a composite outcome defined as the presence of any of those outcomes.  *Statistics –* Logistic regression | 441 participants with 39 composite events. Peak VO2 was included within the HFSS. The HFSS identified people who had events vs. those who were event free (10.0 ± 0.70 vs. 10.6 ± 0.89, p < .001). People with a HFSS <10.4 had an odds ratio of 3.7 for the composite outcome (95% CI 1.7–8.2, p=0.001). | High |
|  |
| Lui 2011 (8) | Assess the relationship between CPET performance and pregnancy outcomes. | *Type of study -* multicentre (n=9) retrospective (1997-2008).  *Patient/inclusion criteria –* Women must have completed CPET within 2 years prior to pregnancy or within their first trimester.  *Outcome –* Maternal and neonatal outcomes. Primary maternal outcomes included heart failure arrhythmia requiring treatment, cardiac arrest, stroke, or death.  *Statistics –* Logistic regression | 89 pregnancies were identified with 15 cardiac events. Peak heart rate was predictive of maternal cardiac event during pregnancy (odds ratio 0.7 to 0.9; p<0.05), whereas peak VO2 and heart rate reserve was not. | Moderate |
| Lytrivi 2013 (9) | Assess whether the cut off of <50% predicted of peak VO2 was associated with death or deterioration in children with ConHD undergoing heart transplant evaluation. | *Type of study* – Single centre retrospective cohort study (2002 to 2011).  *Patient* -all children who underwent heart transplant (HT) evaluation  *Inclusion criteria –* Must have CPET with gas measurement during HT evaluation.  *Outcome* - Composite outcome of death before HT, initiation of mechanical circulatory support, and HT at highest urgency status  *Statistics* - Cox proportional hazard. | 18 children with single ventricle ConHD were included.  Associations between CPET parameters and the composite outcome were:  peak VO2 <50% = HR 1.3, 95% CI 0.1 to 12, p=0.8  peak VO2 <40% = HR 5, 95% CI 0.5 to 45.1, p=0.1  VE/VCO2 slope ≥34 = HR 1.1, 95% CI 0.1 to 10.2, p=0.9 | Low |
| Muller 2018 (10) | Assess how the number of thoracotomies affects  lung function, exercise capacity, and survival. | *Type of study* – Single centre retrospective (2010 to 2015).  *Patient* – Patients with ConHD aged ≥14 years old.  *Inclusion criteria –* Must have CPET and Spirometry data between 2010-15.  *Outcome* - Survival  *Statistics* - Logistic regression analysis | Peak VO2 remained a significant predictor of survival along with age in a multivariate model that included age, number of thoracotomies, FVC, and oxygen saturation at rest (Odds ratio 1.063 95% CI 1.032 to 1.095, p <0.001). | Moderate |
| Ohuchi 2013 (11) | Assess exercise capacity with pregnancy outcomes. | *Type of study* – Single centre retrospective (2000 to 2010).  *Patient* – Pregnant women with ConHD  *Inclusion criteria –* CPET within 6 years of pregnancy  *Outcome –* Maternal and neonatal outcomes. Primary maternal outcomes included heart failure arrhythmia requiring treatment, cardiac arrest, stroke, or death.  *Statistics –* Logistic regression | 33 women with ConHD were included within the study. Peak HR, chronotropic index, systolic BP, peak systolic BP, VO2 at the GET, and peak VO2 were all univariately associated (p<0.05) with maternal cardiac events. Due to a lack of events no multivariate analysis was undertaken. | Moderate |
| Ohuchi 2019 (12) | Assess the exercise capacity over time in people with Fontan circulations. | *Type of study* – Single centre retrospective (1990-2017)  *Patient* – Fontan circulations  *Inclusion criteria –* At least two recorded CPETs.  *Outcome –* Composite outcome of unscheduled hospitalisations.  *Statistics –* Cox proportional hazard. | The changes in peak oxygen uptake (PVO2: % of normal value) from CPX1 to CPX2 (1-dPVO2) and from CPX2 to CPX3 (2-dPVO2) were calculated, and then the patients were divided into four subgroups according the 1-dPVO2 and 2-dPVO2. A positive peak VO2 trajectory was associated with less unscheduled hospitalisations (HR 0.25, 95% CI 0.09 to 0.69). | High |
| Shafer 2018 (13) | Evaluate CPET variables from the last CPET prior to a patient’s death to find prognostically important variables. | *Type of study* – Single centre retrospective (2002-2014).  *Patient* – Fontan circulations and Tetralogy of Fallot.  *Inclusion criteria –* Patients must have had a CPET (with an RER ≥1.05) prior to their death. Each index patient was matched to 3 controls.  *Outcome –* Mortality*.*  *Statistics –* Stepwise multivariable regression. | Multivariate predictors of death for Fontan patients were; BMI, FVC, and the VE/VCO2 slope.  Multivariate predictors of death in patients with tetralogy of Fallot were peak VO2, FVC, and VE/VCO2 slope. | High |
| Srivastava 2019 (14) | Longitudinal study following patients with d‐transposition of the great (d-TGA) arteries who had the Mustard procedure. | *Type of study* – Prospective cohort study.  *Patient* – d-TGA patients who had a mustard procedure.  *Inclusion criteria –* Had the procedure between 1970 and 1986 and had index testing between 2013-17.  *Outcome –* Follow up for death and transplantation.  *Statistics –* Cochran‐Mantel‐Haenszel chi‐square tests. | 31 patients died or underwent cardiac transplantation. Exercise time and workload decrease from time point 1 to both 10‐year and 20‐year follow‐up. However, exercise time, workload, and percent predicted peak VO2 did not appear to be significantly different between non-survivors and survivors. | High |

References

1. Alsaied T, van der Ven JPG, Juggan S, Sleeper LA, Azcue N, Kroft LJ, et al. Relation of Fontan Baffle Stroke Volume to Fontan Failure and Lower Exercise Capacity in Patients With an Atriopulmonary Fontan. Am J Cardiol. 2019;124(1 PG-151–157):151–7.

2. Bauer B, Aboulhosn J, Williams R, Child J. Patients with single-ventricle physiology: Prognostic implications of stress testing. Pediatr Cardiol. 2011;32:891–5.

3. Birkey T, Dixon J, Jacobsen R, Ginde S, Nugent M, Yan K, et al. Cardiopulmonary Exercise Testing for Surgical Risk Stratification in Adults with Congenital Heart Disease.

4. Bredy C, Ministeri M, Kempny A, Alonso-gonzalez R, Swan L, Uebing A, et al. New York Heart Association ( NYHA ) classification in adults with congenital heart disease : relation to objective measures of exercise and outcome. 2018;51–8.

5. DeFaria Yeh D, Stefanescu Schmidt AC, Eisman AS, Serfas JD, Naqvi M, Youniss MA, et al. Impaired right ventricular reserve predicts adverse cardiac outcomes in adults with congenital right heart disease. Heart. 2018;104(24):2044–50.

6. Egbe AC, Connolly HM, Dearani JA, Bonnichsen CR, Niaz T, Allison TG, et al. When is the right time for Fontan conversion? The role of cardiopulmonary exercise test. Int J Cardiol [Internet]. 2016;220:564–8. Available from: http://dx.doi.org/10.1016/j.ijcard.2016.06.209

7. Lin EY, Cohen HW, Bhatt AB, Stefanescu A, Dudzinski D, Defaria Yeh D, et al. Predicting Outcomes Using the Heart Failure Survival Score in Adults with Moderate or Complex Congenital Heart Disease. Congenit Heart Dis. 2015;10(5):387–95.

8. Lui GK, Silversides CK, Khairy P, Fernandes SM, Valente AM, Nickolaus MJ, et al. Heart rate response during exercise and pregnancy outcome in women with congenital heart disease. Circulation. 2011;123(3):242–8.

9. Lytrivi ID, Blume ED, Rhodes J, Dillis S, Gauvreau K, Singh TP. Prognostic value of exercise testing during heart transplant evaluation in children. Circ Hear Fail. 2013;6(4):792–9.

10. Müller J, Ewert P, Hager A. Number of thoracotomies predicts impairment in lung function and exercise capacity in patients with congenital heart disease. J Cardiol. 2018;71(1):88–92.

11. Ohuchi H, Tanabe Y, Kamiya C, Noritake K, Yasuda K, Miyazaki A, et al. Cardiopulmonary variables during exercise predict pregnancy outcome in women with congenital heart disease. Circ J [Internet]. 2013;77(2 PG-470–6):470–6. Available from: NS -

12. Ohuchi H, Negishi J, Miike H, Toyoshima Y, Morimoto H, Fukuyama M, et al. Positive pediatric exercise capacity trajectory predicts better adult Fontan physiology rationale for early establishment of exercise habits. Int J Cardiol [Internet]. 2019;274:80–7. Available from: https://doi.org/10.1016/j.ijcard.2018.06.067

13. Shafer KM, Opotowsky AR, Rhodes J. Exercise testing and spirometry as predictors of mortality in congenital heart disease: Contrasting Fontan physiology with repaired tetralogy of Fallot. Congenit Heart Dis. 2018;13(6):903–10.

14. Srivastava NT, Hurwitz R, Kay WA, Eckert GJ, Kuhlenhoelter A, DeGrave N, et al. The long-term functional outcome in Mustard patients study: Another decade of follow-up. Congenit Heart Dis. 2019;14(2):176–84.

# Funnel plot from primary analysis


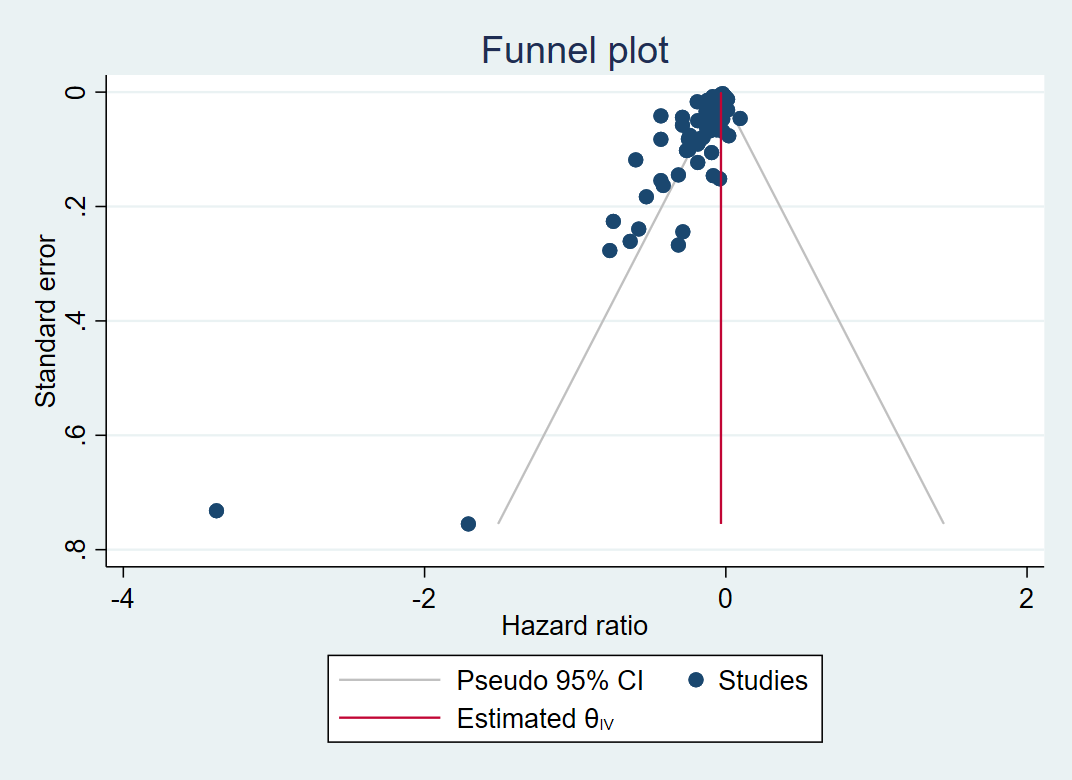


# Data excluded from primary analysis

# Dichotomous data excluded from secondary analysis

# All analyses for individual CPET parameters

## Peak VO2

## VE/VCO2 slope

## Heart rate reserve


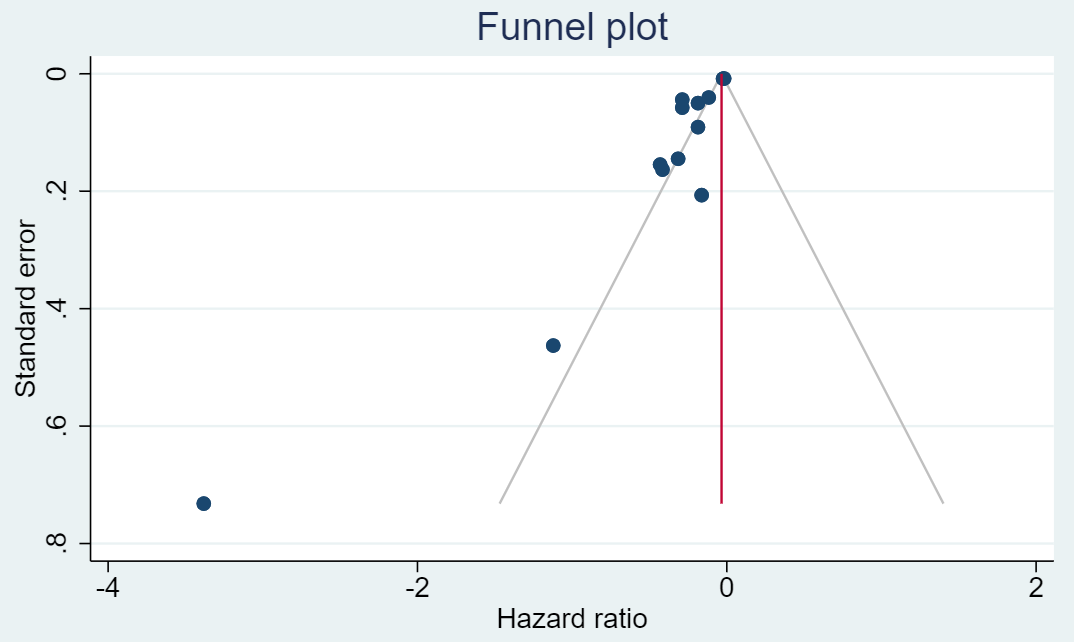


## Gas exchange threshold

## Peak heart rate

## Peak systolic blood pressure

## Peak watts

## Peak oxygen saturations

## Peak oxygen pulse
